# Supplementary material for: Quality of Life and Mortality after Craniotomy for Brain Tumor Removal: A South Korean Nationwide Cohort Study
Source: Research Square preprint supplement (doi:10.21203/rs.3.rs-665140/v1), 2021-06-30
Supplement: Supplementary file 1 [file 9fbcb9ad727da87d960d2dd5.docx]

eTable 1. The specific diseases that can be registered as brain disabilities

| ICD-10 | Disease |
| --- | --- |
| I60-I69 | cerebrovascular diseases |
| G80-G83 | cerebral palsy and other paralytic syndromes |
| G20-G26 | extrapyramidal and movement disorders |
| S00-S09 | injuries to the head |
| G90-G99 | other disorders of the nervous system |
| G10-G14 | systemic atrophies primarily affecting the central nervous system |
| G30-G32 | other degenerative diseases of the nervous system |
| T90-T98 | sequelae of injuries, of poisoning and of other consequences of external causes |
| Q00-Q07 | congenital malformations of the nervous system |
| G35-G37 | demyelinating diseases of the central nervous system |
| Q90-Q99 | chromosomal abnormalities, not elsewhere classified |
| H46-H48 | disorders of optic nerve and visual pathways |
| A80-A89 | viral infections of the central nervous system |
| V10-V19 | pedal cyclist injured in transport accident |
| P90-P96 | other disorders originating in the perinatal period |
| P05-P08 | disorders related to length of gestation and fetal growth |
| V20-V29 | motorcycle rider injured in transport accident |
| P10-P15 | Birth trauma |
| V01-V09 | pedestrian injured in transport accident |
| W00-W19 | falls |
| V40-V49 | car occupant injured in transport accident |
| V98-V99 | other and unspecified transport accidents |
